# Supplementary material
Source: PubMed Central journal article supplement (PMC4967496)
Supplement: NIHMS802504-supplement-Supplementary_file.pdf [file NIHMS802504-supplement-Supplementary_file.pdf]

**Supplementary Table 1.** The AUCs and corresponding sensitivity and specificity of the ten miRNAs that display different expression between lung cancer patients and controls in a training set.

| miRNAs     | P-value | AUC  | Sensitivity (95% CI)  | Specificity (95% CI)  |
|------------|---------|------|-----------------------|-----------------------|
| miR-21     | 0.005   | 0.61 | 53.1 (40.2% to 65.7%) | 55.9 (43.3% to 67.9%) |
| miR-126    | 0.003   | 0.62 | 56.2 (44.1% to 67.8%) | 58.1 (47.4% to 68.2%) |
| miR-205    | 0.008   | 0.62 | 55 (41.6% to 67.9%)   | 62.3 (48.9% to 74.4%) |
| miR-375    | 0.002   | 0.64 | 53.6 (39.7% to 67.0%) | 61.0 (47.4% to 73.5%) |
| miR200b    | <0.001  | 0.67 | 57.9 (45.5% to 69.8%) | 55.9 (43.3% to 67.9%) |
| miR-182    | <0.001  | 0.68 | 60 (45.2% to 73.6%)   | 58.5 (42.1% to 73.7%) |
| miR-486-5p | <0.001  | 0.68 | 57.5 (45.4% to 69.0%) | 57.1 (44.1% to 69.5%) |
| miR-708    | <0.001  | 0.69 | 57.9 (45.5% to 69.8%) | 65 (51.6% to 76.9%)   |
| miR-210    | <0.001  | 0.78 | 65.8 (54.0% to 76.3%) | 73.8 (63.1% to 82.8%) |
| miR-31     | <0.001  | 0.79 | 76 (64.8% to 85.1%)   | 71.4 (59.4% to 81.6%) |

Abbreviations: AUC, the area under receiver operating characteristic curve; CI, confidence interval.

**Supplementary Table 2.** The AUCs and corresponding sensitivity and specificity of the two miRNAs that display different expression between lung cancer patients and controls in a testing set.

| miRNAs  | P-value | AUC  | Sensitivity (95% CI)  | Specificity (95% CI)  |
|---------|---------|------|-----------------------|-----------------------|
| miR-210 | <0.001  | 0.79 | 62.6 (53.0% to 78.5%) | 71.8 (62.8% to 85.1%) |
| miR-31  | <0.001  | 0.77 | 75.3 (62.5% to 84.8%) | 73.5 (57.6% to 79.5%) |

Abbreviations: AUC, the area under receiver operating characteristic curve; CI, confidence interval.
